# Supplementary material
Source: MDPI journal article supplement (https://www.mdpi.com/1999-4907/12/9/1271)
Supplement: s1 [file s1]

**Supporting information to:**

**Nitrogen, phosphorus distribution and relationship under different aged Chinese  
fir plantations in Hunan, China**

ZhenanYang<sup>a,b\*</sup>, Zhibin Luo<sup>c\*</sup>

\*Corresponding authors: Dr. Zhen'an Yang or Prof. Dr. Zhi-Bin Luo  
E-mail: yza2765@cwnu.edu.cn (yza2765@126.com) or luozbbill@163.com

**Supplementary Table S1.** General characteristics of different aged Chinese fir plantations.

| Stand Age<br>(years) | Geographical<br>Position  | Altitude<br>(m) | Trees Density<br>(trees ha <sup>-2</sup> ) | Mean Height<br>(m) | Mean DBH<br>(cm) |
|----------------------|---------------------------|-----------------|--------------------------------------------|--------------------|------------------|
| 10a                  | 109°30'10"E<br>26°57'06"N | 473             | 2125                                       | 6.3 ± 0.33         | 8.8 ± 0.51       |
| 20a                  | 109°35'55"E<br>26°51'39"N | 500             | 1650                                       | 11.8 ± 0.22        | 17.2 ± 0.25      |
| 30a                  | 109°39'15"E<br>26°52'01"N | 467             | 1250                                       | 14.8 ± 0.40        | 23.6 ± 0.29      |

DBH is diameter at the breast height. Data indicate mean ± SE (n = 9 in each stand).

**Supplementary Table S2.** Biomass allometric equation of different aged Chinese fir plantations.

| Organ        | Regression Equation    | $R^2$  |
|--------------|------------------------|--------|
| coarse roots | $W=0.0124DBH^{2.521}$  | 0.9608 |
| stem         | $W=0.0871DBH^{2.3002}$ | 0.9748 |
| leaves       | $W=0.0286DBH^{1.8901}$ | 0.9041 |

$W$  is biomass (dry weight, kg);  $DBH$  is diameter at breast height (cm);  $R^2$  is the correlation equations coefficient (n = 9 in each stand).

**Supplementary Table S3.** Correlations between soil (0-10 and 10-20 cm) and fine roots, leaves nutrients.

| Soil Layer (cm) |   | Fine roots N                        | Fine Roots P   | Leaves N       | Leaves P       |
|-----------------|---|-------------------------------------|----------------|----------------|----------------|
| 0-10            | N | <b><math>R^2= 0.2935</math></b>     | $R^2= 0.0120$  | $R^2= 0.0429$  | $R^2= 0.1150$  |
|                 |   | <b><math>P= 0.0021^{**}</math></b>  | $P= 0.2622$    | $P= 0.1537$    | $P= 0.4675$    |
|                 | P | $R^2= 0.0229$                       | $R^2= 0.0708$  | $R^2= 0.0528$  | $R^2= -0.0396$ |
|                 |   | $P= 0.2162$                         | $P= 0.0965$    | $P= 0.1301$    | $P= 0.9925$    |
| 10-20           | N | <b><math>R^2= 0.3680</math></b>     | $R^2= -0.0156$ | $R^2= -0.0318$ | $R^2= 0.0936$  |
|                 |   | <b><math>P= 0.0005^{***}</math></b> | $P= 0.4452$    | $P= 0.6599$    | $P= 0.0664$    |
|                 | P | <b><math>R^2= 0.1264</math></b>     | $R^2= -0.0396$ | $R^2= -0.0399$ | $P= -0.0069$   |
|                 |   | <b><math>P= 0.0387^*</math></b>     | $P= 0.9225$    | $P= 0.9605$    | $P= 0.3734$    |

Date for correlation analysis were the values of nutrients concentrations ( $\text{g kg}^{-1}$ ) soil (0-10 and 10-20 cm) and fine roots, leaves ( $n = 27$ ). The correlation coefficient ( $R^2$ ) and  $P$  values of the statistics were shown.
